# Supplementary material for: Nucleoside Metabolism Is Induced in Common Bean During Early Seedling Development
Source: Front Plant Sci. 2021 Mar 25;12:651015. doi: 10.3389/fpls.2021.651015 (PMC8027947; doi:10.3389/fpls.2021.651015)
Supplement: Supplementary file 2 [file Table_1.xlsx]

## Sheet: proteins
Supplementary Table S4: Protein identification from LC-MSMS analyses of fractions of purified PvNSH2 expressed as recombinant protein in N. bentamiana. Protein identification was performed using the software Peaks X with parameters set as described in Material and Methods.
Protein Group	Protein ID	Accession	-10lgP	Coverage (%)	Coverage (%) Sample 2	Area Sample 2	#Peptides	#Unique	#Spec Sample 2	PTM	Avg. Mass	Description
1	76905	NSH2	374.93	72	72	291000000	31	31	124	Carbamidomethylation	34646	sp|NSH2|
1	56493	NbS00005145g0010.1	132.99	5	5	2280000	3	3	3		44569	uridine nucleosidase 2
2	56332	NbS00046603g0005.1	314.04	15	15	822000	27	5	31	Carbamidomethylation	245714	Acetyl CoA carboxylase
3	56333	NbS00016612g0003.1	289.17	18	18	288000	22	3	26	Carbamidomethylation	162239	Acetyl CoA carboxylase
4	56337	NbS00008187g0001.1	241.47	30	30	7150000	6	3	9	Carbamidomethylation	28767	NADP binding Rossmann fold
5	56342	NbS00041576g0003.1	222.1	29	29	48100000	9	7	16	Carbamidomethylation; Oxidation (M)	25764	Biotin carboxyl carrier protein of acetyl CoA carboxylase...
5	56353	NbS00008649g0004.1	209.62	24	24	24100000	8	6	14	Carbamidomethylation; Oxidation (M)	25645	Biotin carboxyl carrier protein of acetyl CoA carboxylase...
6	56355	NbS00029393g0012.1	206.31	10	10	195000	3	2	4	Carbamidomethylation	49090	Ribulose bisphosphate carboxylase_oxygenase activase 1 ch...
7	56354	NbS00007414g0017.1	204.33	29	29	13600000	7	5	16	Carbamidomethylation	26489	Acetyl CoA carboxylase biotin carboxyl carrier protein
7	56369	NbS00021532g0013.1	197.47	24	24	7690000	6	4	14	Carbamidomethylation	27556	Biotin carboxyl carrier protein of acetyl CoA carboxylase...
8	56368	NbS00005925g0010.1	191.69	24	24	211000	5	2	6	Carbamidomethylation	30026	Acetyl CoA carboxylase biotin carboxyl carrier protein
9	56442	NbS00015644g0022.1	187.65	20	20	1120000	3	2	5	Carbamidomethylation	25889	Biotin carboxyl carrier protein of acetyl CoA carboxylase...
10	56347	NbS00001169g0153.1	167.23	17	17	983000	5	4	5	Carbamidomethylation	36300	NbS00001169g0153.1
10	56348	NbS00019521g0023.1	163.11	18	18	983000	5	4	5	Carbamidomethylation	34920	Glyceraldehyde 3 phosphate dehydrogenase A chloroplastic ...
11	56394	NbS00050671g0012.1	166.98	21	21	292000	4	2	6	Carbamidomethylation	28666	Chlorophyll a b binding protein 37 chloroplastic
11	56395	NbS00019403g0016.1	166.98	21	21	292000	4	2	6	Carbamidomethylation	28680	Chlorophyll a b binding protein 4 chloroplastic
11	56393	NbS00000471g0009.1	166.98	19	19	292000	4	2	6	Carbamidomethylation	32576	Chlorophyll a b binding protein 37 chloroplastic
11	56397	NbS00032129g0003.1	166.98	21	21	292000	4	2	6	Carbamidomethylation	28604	Chlorophyll a b binding protein 4 chloroplastic
12	56358	NbS00027305g0008.1	164.87	21	21	1430000	4	4	4		31046	Chlorophyll a b binding protein 6A chloroplastic
12	56357	NbS00017935g0003.1	164.87	21	21	1430000	4	4	4		31085	Chlorophyll a b binding protein 6A chloroplastic
13	56350	NbS00040865g0006.1	160.02	9	9	103000	4	3	4		66646	Heat shock protein
13	56360	NbS00000671g0042.1	153.28	9	9	103000	4	3	4		63303	Heat shock protein
13	56378	NbS00031872g0001.1	128.55	8	8	103000	3	2	3		61999	Heat shock protein
13	56411	NbS00039676g0017.1	116.49	7	7	103000	3	2	3		62554	Heat shock protein
14	56349	NbS00052944g0006.1	135.8	7	7	229000	4	4	5	Carbamidomethylation	77399	Stromal 70 kDa heat shock related protein chloroplastic
14	56351	NbS00029684g0026.1	135.8	7	7	229000	4	4	5	Carbamidomethylation	75244	chloroplast heat shock protein 70 1
15	56372	NbS00006821g0002.1	131	8	8	136000	4	4	5		53285	Phosphoglycerate kinase
15	56373	NbS00001859g0006.1	131	7	7	136000	4	4	5		58611	Phosphoglycerate kinase
16	56427	NbS00035687g0007.1	124.79	11	11	128000	2	2	2		29004	chloroplast photosystem II 22 kDa component
17	56387	NbS00006464g0001.1	124	9	9	211000	3	3	3	Carbamidomethylation	41714	Tubulin beta chain
17	56450	NbS00023211g0007.1	93.04	7	7	46000	2	2	2	Carbamidomethylation	37988	Tubulin beta chain
18	56414	NbS00004085g0015.1	119.11	19	19	1290000	3	3	3		23553	Chlorophyll a b binding protein CP26 chloroplastic
18	56478	NbS00008488g0031.1	98.31	17	17	1290000	2	2	2		15109	Chlorophyll a b binding protein CP26 chloroplastic
19	56392	NbS00003611g0307.1	115.55	5	5	279000	2	2	2		42302	NbS00003611g0307.1
19	56396	NbS00041085g0002.1	115.55	5	5	279000	2	2	2		48465	Actin
19	56417	NbS00017698g0005.1	115.55	5	5	279000	2	2	2		46115	Actin 4
19	56494	NbS00009004g0014.1	99.81	5	5	279000	2	2	2		49174	Actin
19	56495	NbS00018787g0010.1	99.81	4	4	279000	2	2	2		49775	Actin 4
19	56505	NbS00056638g0007.1	99.81	7	7	279000	2	2	2		31319	Actin 4
20	56433	NbS00010129g0001.1	114.79	7	7	114000	2	2	2		35249	Beta 1 3 glucanase
20	56434	NbC25742659g0003.1	114.79	6	6	114000	2	2	2		37651	Glucan endo 1 3 beta glucosidase_2C acidic isoform GI9
21	56418	NbS00030208g0012.1	105.32	17	17	47800	2	2	2		25861	Chlorophyll a b binding protein P4 chloroplastic
21	56419	NbS00004739g0001.1	105.32	16	16	47800	2	2	2		27689	Chlorophyll a b binding protein P4 chloroplastic
22	56533	NbS00014241g0002.1	95.37	11	11	228000	2	2	2		21846	ATP synthase subunit alpha chloroplastic
23	56518	NbS00061093g0007.1	93.28	12	12	382000	2	2	2		22505	Photosystem I reaction center subunit III
23	56519	NbS00000058g0018.1	93.28	11	11	382000	2	2	2		24306	Photosystem I reaction center subunit III
23	56520	NbS00035792g0016.1	93.28	11	11	382000	2	2	2		24658	Photosystem I reaction center subunit III
23	56521	NbS00009051g0007.1	93.28	10	10	382000	2	2	2		27312	Photosystem I reaction center subunit III

## Sheet: peptides
Protein Group	Protein ID	Protein Accession	Peptide	Unique	-10lgP	Mass	Length	ppm	m/z	z	RT	Area Sample 2	Fraction	Scan	#Feature	#Feature Sample 2	Start	End	PTM	AScore	Found By
1	76905	NSH2	R.TDIPVAEGTHLTLTK.G	Y	108.88	1594.86	15	-0.2	798.435	2	46.31	62900000	2	14980	2	2	64	78			PEAKS DB
1	76905	NSH2	K.GKPIEESAASFLVR.Q	Y	101.06	1502.81	14	-0.5	752.412	2	48.18	57000000	2	16148	8	8	104	117			PEAKS DB
1	76905	NSH2	K.GVYLHDPTVVLAAVDPSLVTC(+57.02)IEGIVR.V	Y	100.76	2892.54	27	1.7	965.189	3	74.42	4450000	2	29925	2	2	243	269	Carbamidomethylation	C21:Carbamidomethylation:1000.00	PEAKS DB
1	76905	NSH2	V.LAAVDPSLVTC(+57.02)IEGIVR.V	Y	96.96	1811.98	17	0.3	906.998	2	73.98	2020000	2	29566	2	2	253	269	Carbamidomethylation	C11:Carbamidomethylation:1000.00	PEAKS DB
1	76905	NSH2	K.VTVVALGPLTNIALAIELDPEFVK.N	Y	91.83	2521.44	24	-4.1	1261.72	2	75.11	2490000	2	30506	2	2	126	149			PEAKS DB
1	76905	NSH2	R.IADFVHGADGLGNQNFPPPK.G	Y	91.13	2093.03	20	-0.3	1047.52	2	51.03	49300000	2	17814	3	3	84	103			PEAKS DB
1	76905	NSH2	Y.LHDPTVVLAAVDPSLVTC(+57.02)IEGIVR.V	Y	90.36	2573.39	24	-1.5	858.802	3	74.24	45600	2	29824	1	1	246	269	Carbamidomethylation	C18:Carbamidomethylation:1000.00	PEAKS DB
1	76905	NSH2	D.PTVVLAAVDPSLVTC(+57.02)IEGIVR.V	Y	89.39	2208.22	21	-0.1	1105.12	2	74.46	464000	2	29985	1	1	249	269	Carbamidomethylation	C15:Carbamidomethylation:1000.00	PEAKS DB
1	76905	NSH2	R.NALHLLEVAGR.T	Y	79.9	1191.67	11	-1.3	596.843	2	50.76	38000000	2	16836	10	10	53	63			PEAKS DB
1	76905	NSH2	Y.GNVYTTLATR.N	Y	75.91	1094.57	10	-0.2	548.293	2	40.49	444000	2	11974	1	1	43	52			PEAKS DB
1	76905	NSH2	D.PSLVTC(+57.02)IEGIVR.V	Y	69.8	1342.73	12	-0.6	672.371	2	64.54	4020000	2	24537	1	1	258	269	Carbamidomethylation	C6:Carbamidomethylation:1000.00	PEAKS DB
1	76905	NSH2	K.VAVTVDAPR.V	Y	69.19	926.519	9	0.3	464.267	2	35.44	24300000	2	9719	1	1	303	311			PEAKS DB
1	76905	NSH2	K.IIIDTDPGIDDAMAIFVAL.Q	Y	69.01	2002.03	19	-1.7	1002.02	2	76.46	555000	2	31292	1	1	10	28			PEAKS DB
1	76905	NSH2	R.GLTLLYNK.Q	Y	68.73	920.533	8	0.5	461.274	2	47.85	17300000	2	15699	1	1	278	285			PEAKS DB
1	76905	NSH2	K.VTVVALGPLTNIAL.A	Y	68.17	1379.84	14	-0.7	690.926	2	74.99	2100000	2	30383	1	1	126	139			PEAKS DB
1	76905	NSH2	K.VTVVALGPLTNIALA.I	Y	66.28	1450.88	15	-0.4	726.445	2	74.93	2390000	2	30326	1	1	126	140			PEAKS DB
1	76905	NSH2	I.YGNVYTTLATR.N	Y	62.89	1257.64	11	-0.5	629.825	2	44.71	853000	2	14049	1	1	42	52			PEAKS DB
1	76905	NSH2	K.GKPIEESAASF.L	Y	62.13	1134.56	11	0.2	568.285	2	40.06	638000	2	11852	1	1	104	114			PEAKS DB
1	76905	NSH2	K.ILDVYFSYHQESYNTK.G	Y	61.22	2005.94	16	-1	1003.98	2	51.89	4620000	2	18144	3	3	227	242			PEAKS DB
1	76905	NSH2	L.AAVDPSLVTC(+57.02)IEGIVR.V	Y	59.73	1698.9	16	-0.5	567.306	3	70.93	139000	2	27835	1	1	254	269	Carbamidomethylation	C10:Carbamidomethylation:1000.00	PEAKS DB
1	76905	NSH2	R.VQTSGITR.G	Y	58.77	860.472	8	0.7	431.243	2	25.33	8120000	2	6511	1	1	270	277			PEAKS DB
1	76905	NSH2	L.GINVTHQVILTSSDR.E	Y	56.77	1638.87	15	-0.1	820.442	2	41.19	432000	2	12287	1	1	196	210			PEAKS DB
1	76905	NSH2	L.QSPEIEVIGLTTIYGNVYTTLATR.N	Y	56.21	2638.39	24	-1.6	880.468	3	74.52	174000	2	30043	1	1	29	52			PEAKS DB
1	76905	NSH2	K.IIIDTDPGIDDAMAI.F	Y	55.14	1571.78	15	-0.3	786.895	2	74.56	410000	2	30095	1	1	10	24			PEAKS DB
1	76905	NSH2	R.IADFVHGADGL.G	Y	54.45	1113.55	11	0.3	557.78	2	54.06	252000	2	19085	1	1	84	94			PEAKS DB
1	76905	NSH2	R.FGEIHEWSNKPTVK.V	Y	52.14	1670.84	14	-0.5	557.954	3	43.03	896000	2	13157	2	2	289	302			PEAKS DB
1	76905	NSH2	K.VTVVALGPLTNI.A	Y	50.62	1195.72	12	-0.6	598.866	2	74.41	64800	2	29933	1	1	126	137			PEAKS DB
1	76905	NSH2	K.IIIDTDPGIDDAMAIF.V	Y	49.88	1718.84	16	-0.2	860.429	2	75.51	1320000	2	30739	1	1	10	25			PEAKS DB
1	76905	NSH2	T.TIYGNVYTTLATR.N	Y	49.61	1471.77	13	-0.9	736.89	2	54.31	164000	2	19186	1	1	40	52			PEAKS DB
1	76905	NSH2	K.GVYLHDPTVVLAAVDPSLV.T	Y	49.52	1964.06	19	-0.4	983.038	2	74.11	75000	2	29697	1	1	243	261			PEAKS DB
1	76905	NSH2	K.FAQYLHK.I	Y	49.48	905.476	7	0.8	453.746	2	31.31	5540000	2	8522	1	1	220	226			PEAKS DB
1	56493	NbS00005145g0010.1	K.IIIDTDPGIDDAMAIFVAL.Q	Y	69.01	2002.03	19	-1.7	1002.02	2	76.46	555000	2	31292	1	1	8	26			PEAKS DB
1	56493	NbS00005145g0010.1	K.IIIDTDPGIDDAMAI.F	Y	55.14	1571.78	15	-0.3	786.895	2	74.56	410000	2	30095	1	1	8	22			PEAKS DB
1	56493	NbS00005145g0010.1	K.IIIDTDPGIDDAMAIF.V	Y	49.88	1718.84	16	-0.2	860.429	2	75.51	1320000	2	30739	1	1	8	23			PEAKS DB
2	56332	NbS00046603g0005.1	R.DSFIETLEGWAR.T	N	88.11	1422.68	12	-0.5	712.346	2	74.42	63800	2	29945	1	1	1848	1859			PEAKS DB
2	56332	NbS00046603g0005.1	K.AILLVAMATPEDMR.I	N	84.31	1529.79	14	-1.1	765.904	2	66.28	0	2	25493	0	0	103	116			PEAKS DB
2	56332	NbS00046603g0005.1	K.SNTTYC(+57.02)YDFPLAFEAALEK.S	N	81.78	2239.01	19	-1.7	1120.51	2	74.06	181000	2	29659	1	1	1485	1503	Carbamidomethylation	C6:Carbamidomethylation:1000.00	PEAKS DB
2	56332	NbS00046603g0005.1	R.EELPLFILANWR.G	N	79.87	1499.81	12	-0.6	750.914	2	74.63	141000	2	30154	1	1	1896	1907			PEAKS DB
2	56332	NbS00046603g0005.1	R.ALAIANMVLGLK.E	N	76.93	1212.73	12	-0.4	607.37	2	69.86	337000	2	27222	1	1	527	538			PEAKS DB
2	56332	NbS00046603g0005.1	R.DAAGDQLSYK.S	N	72.28	1066.49	10	-0.5	534.254	2	33.99	98800	2	9146	1	1	2096	2105			PEAKS DB
2	56332	NbS00046603g0005.1	K.IIEEGPITIASPETVK.K	Y	71.85	1695.93	16	-1.1	848.971	2	54.63	249000	2	19385	1	1	335	350			PEAKS DB
2	56332	NbS00046603g0005.1	K.LILSLMEQLVYPNPAAYR.D	N	70.28	2090.12	18	-0.1	697.715	3	74.46	329000	2	29979	2	2	931	948			PEAKS DB
2	56332	NbS00046603g0005.1	K.FGDSAFDLR.A	Y	69.66	1026.48	9	-0.5	514.245	2	51.49	135000	2	17706	1	1	2161	2169			PEAKS DB
2	56332	NbS00046603g0005.1	R.TVGIGAYLAR.L	N	68.58	1019.58	10	0.4	510.796	2	49.85	378000	2	16780	1	1	1717	1726			PEAKS DB
2	56332	NbS00046603g0005.1	R.ALPQGLVALLQK.V	N	65.95	1249.78	12	-0.4	625.895	2	66.65	757000	2	25617	2	2	2170	2181			PEAKS DB
2	56332	NbS00046603g0005.1	R.EDAFFQAVTDVAC(+57.02)TQK.L	N	63.55	1828.83	16	0.1	915.422	2	65.62	252000	2	25079	1	1	1589	1604	Carbamidomethylation	C13:Carbamidomethylation:1000.00	PEAKS DB
2	56332	NbS00046603g0005.1	R.GGAWVVVDSK.I	N	62.2	1016.53	10	0	509.272	2	44.49	124000	2	13916	1	1	1950	1959			PEAKS DB
2	56332	NbS00046603g0005.1	E.DGLGVENLSGSGAIASAYSR.A	N	59.35	1922.93	20	-0.8	962.473	2	58.86	89800	2	21768	1	1	1683	1702			PEAKS DB
2	56332	NbS00046603g0005.1	R.TNVDYTIDLLHASDYR.D	N	57.42	1894.91	16	0.6	948.461	2	57.6	218000	2	21006	1	1	548	563			PEAKS DB
2	56332	NbS00046603g0005.1	K.ATELAFPDQK.G	N	57.18	1118.56	10	0.3	560.288	2	43.25	337000	2	13258	1	1	1523	1532			PEAKS DB
2	56332	NbS00046603g0005.1	R.SEISEFC(+57.02)NALGGK.Q	Y	56.34	1410.64	13	-0.3	706.33	2	53.38	71800	2	18799	1	1	56	68	Carbamidomethylation	C7:Carbamidomethylation:1000.00	PEAKS DB
2	56332	NbS00046603g0005.1	R.GVLEAHLR.S	N	54.95	893.508	8	0.2	447.762	2	34.14	129000	2	9205	1	1	835	842			PEAKS DB
2	56332	NbS00046603g0005.1	R.LLEPLLSVVK.S	N	54.86	1109.71	10	0	555.86	2	64.78	275000	2	24615	1	1	855	864			PEAKS DB
2	56332	NbS00046603g0005.1	R.AYHETFTLTYVTGR.T	N	54.62	1657.81	14	-0.5	829.912	2	49.2	40300	2	16484	1	1	1703	1716			PEAKS DB
2	56332	NbS00046603g0005.1	Q.TAQALMDFNR.E	N	54.5	1165.55	10	-0.9	583.784	2	46.83	66200	2	15148	1	1	1886	1895			PEAKS DB
2	56332	NbS00046603g0005.1	K.IPPESC(+57.02)LVSIPDEIYSK.A	Y	53.6	1945.97	17	-1	973.992	2	63.86	269000	2	24091	1	1	220	236	Carbamidomethylation	C6:Carbamidomethylation:1000.00	PEAKS DB
2	56332	NbS00046603g0005.1	R.IGAAEEVK.S	N	53.17	815.439	8	0.3	408.727	2	26.78	85800	2	6967	1	1	1618	1625			PEAKS DB
2	56332	NbS00046603g0005.1	R.EVVNWESSR.S	N	52.7	1104.52	9	-1.1	553.267	2	39.08	52500	2	11410	1	1	2066	2074			PEAKS DB
2	56332	NbS00046603g0005.1	K.LPLIYLAANSGAR.I	N	52.57	1357.77	13	-1	679.893	2	59.58	955000	2	22177	1	1	1605	1617			PEAKS DB
2	56332	NbS00046603g0005.1	K.GSWGTPLVPVER.H	N	51.19	1296.68	12	-0.6	649.348	2	54.25	294000	2	19179	1	1	1533	1544			PEAKS DB
2	56332	NbS00046603g0005.1	K.LVAETPC(+57.02)K.L	Y	50.94	916.469	8	-0.7	459.241	2	28.25	96900	2	7364	1	1	678	685	Carbamidomethylation	C7:Carbamidomethylation:1000.00	PEAKS DB
3	56333	NbS00016612g0003.1	R.DSFVETLEGWAR.T	Y	84.86	1408.66	12	0	705.338	2	73.99	85000	2	29600	1	1	1067	1078			PEAKS DB
3	56333	NbS00016612g0003.1	K.SNTTYC(+57.02)YDFPLAFEAALEK.S	N	81.78	2239.01	19	-1.7	1120.51	2	74.06	181000	2	29659	1	1	704	722	Carbamidomethylation	C6:Carbamidomethylation:1000.00	PEAKS DB
3	56333	NbS00016612g0003.1	R.EELPLFILANWR.G	N	79.87	1499.81	12	-0.6	750.914	2	74.63	141000	2	30154	1	1	1145	1156			PEAKS DB
3	56333	NbS00016612g0003.1	R.AAISGITDPSGK.W	Y	74.18	1115.58	12	-0.8	558.798	2	37.65	146000	2	10745	1	1	1047	1058			PEAKS DB
3	56333	NbS00016612g0003.1	R.DAAGDQLSYK.S	N	72.28	1066.49	10	-0.5	534.254	2	33.99	98800	2	9146	1	1	1345	1354			PEAKS DB
3	56333	NbS00016612g0003.1	K.LILSLMEQLVYPNPAAYR.D	N	70.28	2090.12	18	-0.1	697.715	3	74.46	329000	2	29979	2	2	168	185			PEAKS DB
3	56333	NbS00016612g0003.1	K.IGDSTLDLR.A	N	70.11	988.519	9	-0.3	495.267	2	42.78	316000	2	13027	1	1	1410	1418			PEAKS DB
3	56333	NbS00016612g0003.1	R.TVGIGAYLAR.L	N	68.58	1019.58	10	0.4	510.796	2	49.85	378000	2	16780	1	1	936	945			PEAKS DB
3	56333	NbS00016612g0003.1	R.ALPQGLVALLQK.V	N	65.95	1249.78	12	-0.4	625.895	2	66.65	757000	2	25617	2	2	1419	1430			PEAKS DB
3	56333	NbS00016612g0003.1	R.EDAFFQAVTDVAC(+57.02)TQK.L	N	63.55	1828.83	16	0.1	915.422	2	65.62	252000	2	25079	1	1	808	823	Carbamidomethylation	C13:Carbamidomethylation:1000.00	PEAKS DB
3	56333	NbS00016612g0003.1	R.GGAWVVVDSK.I	N	62.2	1016.53	10	0	509.272	2	44.49	124000	2	13916	1	1	1199	1208			PEAKS DB
3	56333	NbS00016612g0003.1	E.DGLGVENLSGSGAIASAYSR.A	N	59.35	1922.93	20	-0.8	962.473	2	58.86	89800	2	21768	1	1	902	921			PEAKS DB
3	56333	NbS00016612g0003.1	K.ATELAFPDQK.G	N	57.18	1118.56	10	0.3	560.288	2	43.25	337000	2	13258	1	1	742	751			PEAKS DB
3	56333	NbS00016612g0003.1	K.FAELHDTSFR.M	Y	55.27	1221.58	10	0.6	611.797	2	39.29	57000	2	11532	1	1	1297	1306			PEAKS DB
3	56333	NbS00016612g0003.1	R.GVLEAHLR.S	N	54.95	893.508	8	0.2	447.762	2	34.14	129000	2	9205	1	1	72	79			PEAKS DB
3	56333	NbS00016612g0003.1	R.LLEPLLSVVK.S	N	54.86	1109.71	10	0	555.86	2	64.78	275000	2	24615	1	1	92	101			PEAKS DB
3	56333	NbS00016612g0003.1	R.AYHETFTLTYVTGR.T	N	54.62	1657.81	14	-0.5	829.912	2	49.2	40300	2	16484	1	1	922	935			PEAKS DB
3	56333	NbS00016612g0003.1	K.TAQALMDFNR.E	N	54.5	1165.55	10	-0.9	583.784	2	46.83	66200	2	15148	1	1	1135	1144			PEAKS DB
3	56333	NbS00016612g0003.1	R.IGAAEEVK.S	N	53.17	815.439	8	0.3	408.727	2	26.78	85800	2	6967	1	1	837	844			PEAKS DB
3	56333	NbS00016612g0003.1	R.EVVNWESSR.L	N	52.7	1104.52	9	-1.1	553.267	2	39.08	52500	2	11410	1	1	1315	1323			PEAKS DB
3	56333	NbS00016612g0003.1	K.LPLIYLAANSGAR.I	N	52.57	1357.77	13	-1	679.893	2	59.58	955000	2	22177	1	1	824	836			PEAKS DB
3	56333	NbS00016612g0003.1	K.GSWGTPLVPVER.Q	N	51.19	1296.68	12	-0.6	649.348	2	54.25	294000	2	19179	1	1	752	763			PEAKS DB
4	56337	NbS00008187g0001.1	K.GVVPTAEDVAEAALYLASDESK.F	Y	125.52	2234.1	22	-0.9	1118.05	2	74.52	5250000	2	30036	2	2	220	241			PEAKS DB
4	56337	NbS00008187g0001.1	K.NLC(+57.02)AELGQYGIR.V	Y	83.22	1392.68	12	-0.9	697.348	2	55.31	1300000	2	19818	1	1	172	183	Carbamidomethylation	C3:Carbamidomethylation:1000.00	PEAKS DB
4	56337	NbS00008187g0001.1	R.VFDVNVYGSFLGAK.Y	N	72.28	1514.78	14	-0.4	758.395	2	67.65	1540000	2	26328	1	1	114	127			PEAKS DB
4	56337	NbS00008187g0001.1	R.VNC(+57.02)VSPC(+57.02)AVATPLLVK.A	N	62.93	1726.91	16	-1.4	864.462	2	55.36	978000	2	19802	1	1	184	199	Carbamidomethylation	C3:Carbamidomethylation:1000.00;C7:Carbamidomethylation:1000.00	PEAKS DB
4	56337	NbS00008187g0001.1	K.TIQSVLFSTV	Y	62.11	1093.6	10	-0.7	547.808	2	74.02	594000	2	29573	1	1	264	273			PEAKS DB
4	56337	NbS00008187g0001.1	K.HAVVGLTK.N	N	55.86	823.492	8	-0.2	412.753	2	26.96	452000	2	6974	1	1	164	171			PEAKS DB
5	56342	NbS00041576g0003.1	K.TEYSIPDASSIQAFMSQAADLVELVDSR.D	Y	79.93	3042.45	28	-0.5	1015.16	3	75.66	0	2	30850	0	0	67	94			PEAKS DB
5	56342	NbS00041576g0003.1	R.SPAPGAPPFVK.V	Y	78.24	1066.58	11	0.2	534.298	2	41.92	24000000	2	12798	1	1	179	189			PEAKS DB
5	56342	NbS00041576g0003.1	K.TEYSIPDASSIQAFM(+15.99)SQAADLVELVDSR.D	Y	74.47	3058.44	28	-2	1020.49	3	74.87	459000	2	30327	1	1	67	94	Oxidation (M)	M15:Oxidation (M):1000.00	PEAKS DB
5	56342	NbS00041576g0003.1	S.SIQAFMSQAADLVELVDSR.D	Y	68.98	2079.03	19	-1	1040.52	2	74.81	0	2	30277	0	0	76	94			PEAKS DB
5	56342	NbS00041576g0003.1	K.SSHPPMK.C	Y	60.32	782.375	7	0.4	392.195	2	18.51	1160000	2	5047	1	1	163	169			PEAKS DB
5	56342	NbS00041576g0003.1	R.DIVELQLK.Q	Y	59.75	956.554	8	0.3	479.284	2	54.31	17000000	2	19432	1	1	95	102			PEAKS DB
5	56342	NbS00041576g0003.1	F.M(+15.99)SQAADLVELVDSR.D	Y	59.2	1548.75	14	-0.3	775.38	2	59.44	1140000	2	22114	2	2	81	94	Oxidation (M)	M1:Oxidation (M):1000.00	PEAKS DB
5	56342	NbS00041576g0003.1	K.DC(+57.02)EILIR.K	N	59.17	917.464	7	-2.5	459.738	2	49.04	7210000	2	16643	3	3	105	111	Carbamidomethylation	C2:Carbamidomethylation:1000.00	PEAKS DB
5	56342	NbS00041576g0003.1	K.C(+57.02)PMAGTFYR.S	N	59.11	1101.47	9	-1.4	551.743	2	41.22	344000	2	12304	1	1	170	178	Carbamidomethylation	C1:Carbamidomethylation:1000.00	PEAKS DB
5	56342	NbS00041576g0003.1	Q.AADLVELVDSR.D	Y	53.09	1186.62	11	-2.4	594.316	2	56.37	4360000	2	20336	1	1	84	94			PEAKS DB
5	56353	NbS00008649g0004.1	K.TEYSIPDASSIQAFMSQAADLVELVDSR.D	Y	79.93	3042.45	28	-0.5	1015.16	3	75.66	0	2	30850	0	0	67	94			PEAKS DB
5	56353	NbS00008649g0004.1	K.TEYSIPDASSIQAFM(+15.99)SQAADLVELVDSR.D	Y	74.47	3058.44	28	-2	1020.49	3	74.87	459000	2	30327	1	1	67	94	Oxidation (M)	M15:Oxidation (M):1000.00	PEAKS DB
5	56353	NbS00008649g0004.1	S.SIQAFMSQAADLVELVDSR.D	Y	68.98	2079.03	19	-1	1040.52	2	74.81	0	2	30277	0	0	76	94			PEAKS DB
5	56353	NbS00008649g0004.1	K.SSHPPMK.C	Y	60.32	782.375	7	0.4	392.195	2	18.51	1160000	2	5047	1	1	163	169			PEAKS DB
5	56353	NbS00008649g0004.1	R.DIVELQLK.Q	Y	59.75	956.554	8	0.3	479.284	2	54.31	17000000	2	19432	1	1	95	102			PEAKS DB
5	56353	NbS00008649g0004.1	F.M(+15.99)SQAADLVELVDSR.D	Y	59.2	1548.75	14	-0.3	775.38	2	59.44	1140000	2	22114	2	2	81	94	Oxidation (M)	M1:Oxidation (M):1000.00	PEAKS DB
5	56353	NbS00008649g0004.1	K.DC(+57.02)EILIR.K	N	59.17	917.464	7	-2.5	459.738	2	49.04	7210000	2	16643	3	3	105	111	Carbamidomethylation	C2:Carbamidomethylation:1000.00	PEAKS DB
5	56353	NbS00008649g0004.1	K.C(+57.02)PMAGTFYR.S	N	59.11	1101.47	9	-1.4	551.743	2	41.22	344000	2	12304	1	1	170	178	Carbamidomethylation	C1:Carbamidomethylation:1000.00	PEAKS DB
5	56353	NbS00008649g0004.1	Q.AADLVELVDSR.D	Y	53.09	1186.62	11	-2.4	594.316	2	56.37	4360000	2	20336	1	1	84	94			PEAKS DB
6	56355	NbS00029393g0012.1	R.VPIIVTGNDFSTLYAPLIR.D	N	122.45	2088.16	19	-0.3	1045.09	2	74.11	584000	2	29702	2	2	247	265			PEAKS DB
6	56355	NbS00029393g0012.1	K.IVDNFPGQSIDFFGALR.A	Y	67.49	1894.96	17	-1	948.485	2	74.02	77800	2	29638	1	1	302	318			PEAKS DB
6	56355	NbS00029393g0012.1	R.IGVC(+57.02)TGIFR.T	Y	54.39	1021.54	9	-0.9	511.776	2	50.17	117000	2	16913	1	1	282	290	Carbamidomethylation	C4:Carbamidomethylation:1000.00	PEAKS DB
7	56354	NbS00007414g0017.1	K.SPSETSSATSVSEESISNFISQVSSLVK.L	Y	87.69	2886.4	28	-1.6	963.138	3	74.85	1350000	2	30293	1	1	91	118			PEAKS DB
7	56354	NbS00007414g0017.1	V.SEESISNFISQVSSLVK.L	Y	69.92	1852.94	17	-0.8	927.477	2	74.46	144000	2	29957	1	1	102	118			PEAKS DB
7	56354	NbS00007414g0017.1	K.PSDSSVPPLK.C	Y	66.65	1025.54	10	0.9	513.777	2	33.87	1530000	2	9059	1	1	194	203			PEAKS DB
7	56354	NbS00007414g0017.1	R.DVVELHLK.Q	Y	63.76	951.539	8	-0.5	476.776	2	42.11	4660000	2	13165	1	1	124	131			PEAKS DB
7	56354	NbS00007414g0017.1	R.SPGPGEPPFVK.V	Y	59.7	1110.57	11	0.4	556.293	2	41.8	5960000	2	12729	1	1	213	223			PEAKS DB
7	56354	NbS00007414g0017.1	L.DC(+57.02)EILIR.K	N	59.17	917.464	7	-2.5	459.738	2	49.04	7210000	2	16643	3	3	134	140	Carbamidomethylation	C2:Carbamidomethylation:1000.00	PEAKS DB
7	56354	NbS00007414g0017.1	K.C(+57.02)PMAGTFYR.S	N	59.11	1101.47	9	-1.4	551.743	2	41.22	344000	2	12304	1	1	204	212	Carbamidomethylation	C1:Carbamidomethylation:1000.00	PEAKS DB
7	56369	NbS00021532g0013.1	K.SPSETSSATSVSEESISNFISQVSSLVK.L	Y	87.69	2886.4	28	-1.6	963.138	3	74.85	1350000	2	30293	1	1	135	162			PEAKS DB
7	56369	NbS00021532g0013.1	V.SEESISNFISQVSSLVK.L	Y	69.92	1852.94	17	-0.8	927.477	2	74.46	144000	2	29957	1	1	146	162			PEAKS DB
7	56369	NbS00021532g0013.1	K.PSDSSVPPLK.C	Y	66.65	1025.54	10	0.9	513.777	2	33.87	1530000	2	9059	1	1	239	248			PEAKS DB
7	56369	NbS00021532g0013.1	R.DVVELHLK.Q	Y	63.76	951.539	8	-0.5	476.776	2	42.11	4660000	2	13165	1	1	168	175			PEAKS DB
7	56369	NbS00021532g0013.1	L.DC(+57.02)EILIR.K	N	59.17	917.464	7	-2.5	459.738	2	49.04	7210000	2	16643	3	3	178	184	Carbamidomethylation	C2:Carbamidomethylation:1000.00	PEAKS DB
7	56369	NbS00021532g0013.1	K.C(+57.02)PMAGTFYR	N	59.11	1101.47	9	-1.4	551.743	2	41.22	344000	2	12304	1	1	249	257	Carbamidomethylation	C1:Carbamidomethylation:1000.00	PEAKS DB
8	56368	NbS00005925g0010.1	K.EGQIIGFLDQFGTELPVR.S	Y	96.49	2018.05	18	0.5	1010.03	2	74.33	84800	2	29887	1	1	235	252			PEAKS DB
8	56368	NbS00005925g0010.1	K.ILFNDGEAVGYGDPLIAVLPSFR.G	N	80.13	2462.28	23	-1.6	1232.15	2	74.66	509000	2	30157	2	2	262	284			PEAKS DB
8	56368	NbS00005925g0010.1	K.GFEALITEVC(+57.02)DDTEVAELK.L	N	71.45	2138.01	19	-1.5	713.676	3	74.11	32300	2	29715	1	1	100	118	Carbamidomethylation	C10:Carbamidomethylation:1000.00	PEAKS DB
8	56368	NbS00005925g0010.1	D.PLIAVLPSFR.G	N	56.77	1111.68	10	-0.4	556.845	2	65.42	105000	2	24985	1	1	275	284			PEAKS DB
8	56368	NbS00005925g0010.1	R.SDAAGELLK.I	Y	50.17	902.471	9	0	452.243	2	38.16	126000	2	10950	1	1	253	261			PEAKS DB
9	56442	NbS00015644g0022.1	K.DGDPVGYGDPLISILPSFPGIK.K	Y	109.7	2256.17	22	-1	1129.09	2	75.01	941000	2	30413	2	2	223	244			PEAKS DB
9	56442	NbS00015644g0022.1	K.EGQVVC(+57.02)FIEQLGGELPVESDVSGEVIK.I	N	72.92	2916.44	27	-0.4	973.154	3	74.42	745000	2	29949	2	2	192	218	Carbamidomethylation	C6:Carbamidomethylation:1000.00	PEAKS DB
9	56442	NbS00015644g0022.1	D.PVGYGDPLISILPSFPGIK.K	Y	61.48	1969.09	19	-1.3	985.552	2	74.52	177000	2	30037	1	1	226	244			PEAKS DB
10	56347	NbS00001169g0153.1	K.TFAEEVNAAFR.E	Y	69.61	1253.6	11	-0.8	627.809	2	55.08	413000	2	19643	1	1	258	268			PEAKS DB
10	56347	NbS00001169g0153.1	K.GILDVC(+57.02)DEPLVSVDFR.C	Y	63.12	1832.9	16	-2.2	917.454	2	72.89	0	2	28916	0	0	277	292	Carbamidomethylation	C6:Carbamidomethylation:1000.00	PEAKS DB
10	56347	NbS00001169g0153.1	R.VVDLADIVANQWK	Y	58.1	1469.79	13	-0.1	735.901	2	70.56	227000	2	27604	1	1	329	341			PEAKS DB
10	56347	NbS00001169g0153.1	K.VAINGFGR.I	N	53.79	832.456	8	0.3	417.235	2	40.12	68100	2	11889	1	1	69	76			PEAKS DB
10	56347	NbS00001169g0153.1	K.AVALVLPSLK.G	Y	51.29	1009.65	10	-0.5	505.834	2	59.04	344000	2	21882	1	1	221	230			PEAKS DB
10	56348	NbS00019521g0023.1	K.TFAEEVNAAFR.E	Y	69.61	1253.6	11	-0.8	627.809	2	55.08	413000	2	19643	1	1	247	257			PEAKS DB
10	56348	NbS00019521g0023.1	K.GILDVC(+57.02)DEPLVSVDFR.C	Y	63.12	1832.9	16	-2.2	917.454	2	72.89	0	2	28916	0	0	266	281	Carbamidomethylation	C6:Carbamidomethylation:1000.00	PEAKS DB
10	56348	NbS00019521g0023.1	R.VVDLADIVANQWK	Y	58.1	1469.79	13	-0.1	735.901	2	70.56	227000	2	27604	1	1	318	330			PEAKS DB
10	56348	NbS00019521g0023.1	K.VAINGFGR.I	N	53.79	832.456	8	0.3	417.235	2	40.12	68100	2	11889	1	1	74	81			PEAKS DB
10	56348	NbS00019521g0023.1	K.AVALVLPSLK.G	Y	51.29	1009.65	10	-0.5	505.834	2	59.04	344000	2	21882	1	1	210	219			PEAKS DB
11	56394	NbS00050671g0012.1	K.IYPGGAFDPLGLADDPEAFAELK.V	Y	90.93	2405.18	23	-1.4	1203.6	2	74.42	246000	2	29948	2	2	188	210			PEAKS DB
11	56394	NbS00050671g0012.1	R.WAMLGALGC(+57.02)VFPEILSK.N	Y	79.81	1890.97	17	-1.8	946.492	2	74.73	45700	2	30215	1	1	104	120	Carbamidomethylation	C9:Carbamidomethylation:1000.00	PEAKS DB
11	56394	NbS00050671g0012.1	K.FGEAVWFK.A	N	63.77	982.491	8	-0.6	492.253	2	57.08	853000	2	20807	1	1	125	132			PEAKS DB
11	56394	NbS00050671g0012.1	R.ELEVIHC(+57.02)R.W	N	59.5	1054.52	8	0.3	528.269	2	33.3	651000	2	8860	1	1	96	103	Carbamidomethylation	C7:Carbamidomethylation:1000.00	PEAKS DB
11	56395	NbS00019403g0016.1	K.IYPGGAFDPLGLADDPEAFAELK.V	Y	90.93	2405.18	23	-1.4	1203.6	2	74.42	246000	2	29948	2	2	188	210			PEAKS DB
11	56395	NbS00019403g0016.1	R.WAMLGALGC(+57.02)VFPEILSK.N	Y	79.81	1890.97	17	-1.8	946.492	2	74.73	45700	2	30215	1	1	104	120	Carbamidomethylation	C9:Carbamidomethylation:1000.00	PEAKS DB
11	56395	NbS00019403g0016.1	Q.FGEAVWFK.A	N	63.77	982.491	8	-0.6	492.253	2	57.08	853000	2	20807	1	1	125	132			PEAKS DB
11	56395	NbS00019403g0016.1	R.ELEVIHC(+57.02)R.W	N	59.5	1054.52	8	0.3	528.269	2	33.3	651000	2	8860	1	1	96	103	Carbamidomethylation	C7:Carbamidomethylation:1000.00	PEAKS DB
11	56393	NbS00000471g0009.1	K.IYPGGAFDPLGLADDPEAFAELK.V	Y	90.93	2405.18	23	-1.4	1203.6	2	74.42	246000	2	29948	2	2	224	246			PEAKS DB
11	56393	NbS00000471g0009.1	R.WAMLGALGC(+57.02)VFPEILSK.N	Y	79.81	1890.97	17	-1.8	946.492	2	74.73	45700	2	30215	1	1	140	156	Carbamidomethylation	C9:Carbamidomethylation:1000.00	PEAKS DB
11	56393	NbS00000471g0009.1	K.FGEAVWFK.A	N	63.77	982.491	8	-0.6	492.253	2	57.08	853000	2	20807	1	1	161	168			PEAKS DB
11	56393	NbS00000471g0009.1	R.ELEVIHC(+57.02)R.W	N	59.5	1054.52	8	0.3	528.269	2	33.3	651000	2	8860	1	1	132	139	Carbamidomethylation	C7:Carbamidomethylation:1000.00	PEAKS DB
11	56397	NbS00032129g0003.1	K.IYPGGAFDPLGLADDPEAFAELK.V	Y	90.93	2405.18	23	-1.4	1203.6	2	74.42	246000	2	29948	2	2	188	210			PEAKS DB
11	56397	NbS00032129g0003.1	R.WAMLGALGC(+57.02)VFPEILSK.N	Y	79.81	1890.97	17	-1.8	946.492	2	74.73	45700	2	30215	1	1	104	120	Carbamidomethylation	C9:Carbamidomethylation:1000.00	PEAKS DB
11	56397	NbS00032129g0003.1	K.FGEAVWFK.A	N	63.77	982.491	8	-0.6	492.253	2	57.08	853000	2	20807	1	1	125	132			PEAKS DB
11	56397	NbS00032129g0003.1	R.ELEVIHC(+57.02)R.W	N	59.5	1054.52	8	0.3	528.269	2	33.3	651000	2	8860	1	1	96	103	Carbamidomethylation	C7:Carbamidomethylation:1000.00	PEAKS DB
12	56358	NbS00027305g0008.1	R.LYPGGSFFDPLGLAADPEK.K	Y	79.1	1992.98	19	0	997.499	2	74.22	274000	2	29789	1	1	209	227			PEAKS DB
12	56358	NbS00027305g0008.1	K.NLAGDIIGTR.T	Y	65.43	1028.56	10	0.1	515.288	2	48.3	833000	2	15954	1	1	97	106			PEAKS DB
12	56358	NbS00027305g0008.1	K.ATLQLAEIK.H	Y	64.29	985.581	9	0	493.798	2	46.41	169000	2	14924	1	1	229	237			PEAKS DB
12	56358	NbS00027305g0008.1	K.APEYLDGSLVGDYGFDPFGLGK.P	Y	63.42	2316.09	22	-3.3	1159.05	2	74.38	153000	2	29903	1	1	57	78			PEAKS DB
12	56357	NbS00017935g0003.1	R.LYPGGSFFDPLGLAADPEK.K	Y	79.1	1992.98	19	0	997.499	2	74.22	274000	2	29789	1	1	209	227			PEAKS DB
12	56357	NbS00017935g0003.1	K.NLAGDIIGTR.T	Y	65.43	1028.56	10	0.1	515.288	2	48.3	833000	2	15954	1	1	97	106			PEAKS DB
12	56357	NbS00017935g0003.1	K.ATLQLAEIK.H	Y	64.29	985.581	9	0	493.798	2	46.41	169000	2	14924	1	1	229	237			PEAKS DB
12	56357	NbS00017935g0003.1	K.APEYLDGSLVGDYGFDPFGLGK.P	Y	63.42	2316.09	22	-3.3	1159.05	2	74.38	153000	2	29903	1	1	57	78			PEAKS DB
13	56350	NbS00040865g0006.1	K.FDLTGIAPAPR.G	Y	69.94	1156.62	11	-1	579.319	2	56.23	0	2	20328	0	0	424	434			PEAKS DB
13	56350	NbS00040865g0006.1	K.NQIDEIVLVGGSTR.I	Y	69.04	1499.79	14	0.3	750.905	2	55.57	45700	2	19975	1	1	294	307			PEAKS DB
13	56350	NbS00040865g0006.1	R.IINEPTAAAIAYGLDK.K	N	60.9	1658.89	16	0.3	553.97	3	58.26	73700	2	21440	1	1	138	153			PEAKS DB
13	56350	NbS00040865g0006.1	K.DAGVIAGLNVAR.I	Y	50.98	1154.64	12	0	578.328	2	52.59	57500	2	18317	1	1	126	137			PEAKS DB
13	56360	NbS00000671g0042.1	K.FDLTGIAPAPR.G	Y	69.94	1156.62	11	-1	579.319	2	56.23	0	2	20328	0	0	382	392			PEAKS DB
13	56360	NbS00000671g0042.1	K.NQIDEIVLVGGSTR.I	Y	69.04	1499.79	14	0.3	750.905	2	55.57	45700	2	19975	1	1	252	265			PEAKS DB
13	56360	NbS00000671g0042.1	R.IINEPTAAAIAYGLDK.K	N	60.9	1658.89	16	0.3	553.97	3	58.26	73700	2	21440	1	1	96	111			PEAKS DB
13	56360	NbS00000671g0042.1	K.DAGVIAGLNVAR.I	Y	50.98	1154.64	12	0	578.328	2	52.59	57500	2	18317	1	1	84	95			PEAKS DB
13	56378	NbS00031872g0001.1	K.NQIDEIVLVGGSTR.I	Y	69.04	1499.79	14	0.3	750.905	2	55.57	45700	2	19975	1	1	255	268			PEAKS DB
13	56378	NbS00031872g0001.1	R.IINEPTAAAIAYGLDK.K	N	60.9	1658.89	16	0.3	553.97	3	58.26	73700	2	21440	1	1	99	114			PEAKS DB
13	56378	NbS00031872g0001.1	K.DAGVIAGLNVAR.I	Y	50.98	1154.64	12	0	578.328	2	52.59	57500	2	18317	1	1	87	98			PEAKS DB
13	56411	NbS00039676g0017.1	K.NQIDEIVLVGGSTR.I	Y	69.04	1499.79	14	0.3	750.905	2	55.57	45700	2	19975	1	1	259	272			PEAKS DB
13	56411	NbS00039676g0017.1	R.IINEPTAAAIAYGLDK.K	N	60.9	1658.89	16	0.3	553.97	3	58.26	73700	2	21440	1	1	103	118			PEAKS DB
13	56411	NbS00039676g0017.1	K.DAGVIAGLNVAR.I	Y	50.98	1154.64	12	0	578.328	2	52.59	57500	2	18317	1	1	91	102			PEAKS DB
14	56349	NbS00052944g0006.1	K.LSFSDIDEVILVGGSTR.I	Y	71.54	1806.94	17	-0.4	904.475	2	74.11	108000	2	29701	2	2	410	426			PEAKS DB
14	56349	NbS00052944g0006.1	K.NQADSVVYQTEK.Q	Y	59.79	1380.65	12	-0.1	691.333	2	33.45	32900	2	8927	1	1	618	629			PEAKS DB
14	56349	NbS00052944g0006.1	K.SFAAEEISAQVLR.K	Y	59.36	1419.74	13	-0.7	710.875	2	57.2	64500	2	20832	1	1	175	187			PEAKS DB
14	56349	NbS00052944g0006.1	K.LDC(+57.02)PAIGK.S	Y	58.28	872.443	8	0	437.229	2	34.75	23600	2	9440	1	1	167	174	Carbamidomethylation	C3:Carbamidomethylation:1000.00	PEAKS DB
14	56351	NbS00029684g0026.1	K.LSFSDIDEVILVGGSTR.I	Y	71.54	1806.94	17	-0.4	904.475	2	74.11	108000	2	29701	2	2	390	406			PEAKS DB
14	56351	NbS00029684g0026.1	K.NQADSVVYQTEK.Q	Y	59.79	1380.65	12	-0.1	691.333	2	33.45	32900	2	8927	1	1	598	609			PEAKS DB
14	56351	NbS00029684g0026.1	K.SFAAEEISAQVLR.K	Y	59.36	1419.74	13	-0.7	710.875	2	57.2	64500	2	20832	1	1	175	187			PEAKS DB
14	56351	NbS00029684g0026.1	K.LDC(+57.02)PAIGK.S	Y	58.28	872.443	8	0	437.229	2	34.75	23600	2	9440	1	1	167	174	Carbamidomethylation	C3:Carbamidomethylation:1000.00	PEAKS DB
15	56372	NbS00006821g0002.1	K.YSLAPLVPR.L	Y	65.16	1014.59	9	0.5	508.301	2	53.05	55300	2	18620	1	1	166	174			PEAKS DB
15	56372	NbS00006821g0002.1	K.TFNDALDTTK.T	Y	55.23	1124.53	10	-0.2	563.275	2	38.68	32000	2	11214	1	1	408	417			PEAKS DB
15	56372	NbS00006821g0002.1	R.LSELLGIQVVK.A	Y	52.35	1197.73	11	-1.1	599.873	2	59.21	26700	2	22035	1	1	175	185			PEAKS DB
15	56372	NbS00006821g0002.1	K.SVGDLTAAELK.G	Y	50.08	1102.59	11	0.6	552.301	2	45.29	21800	2	14362	1	1	80	90			PEAKS DB
15	56373	NbS00001859g0006.1	K.YSLAPLVPR.L	Y	65.16	1014.59	9	0.5	508.301	2	53.05	55300	2	18620	1	1	149	157			PEAKS DB
15	56373	NbS00001859g0006.1	K.TFNDALDTTK.T	Y	55.23	1124.53	10	-0.2	563.275	2	38.68	32000	2	11214	1	1	392	401			PEAKS DB
15	56373	NbS00001859g0006.1	R.LSELLGIQVVK.A	Y	52.35	1197.73	11	-1.1	599.873	2	59.21	26700	2	22035	1	1	158	168			PEAKS DB
15	56373	NbS00001859g0006.1	K.SVGDLTAAELK.G	Y	50.08	1102.59	11	0.6	552.301	2	45.29	21800	2	14362	1	1	80	90			PEAKS DB
16	56427	NbS00035687g0007.1	R.VAMIGFAASLLGEAITGK.G	Y	83.56	1747.95	18	-1.5	874.983	2	74.8	0	2	30264	0	0	104	121			PEAKS DB
16	56427	NbS00035687g0007.1	K.FIDDPVPATGLDK.A	Y	52.98	1386.7	13	1	694.36	2	51.62	128000	2	17786	1	1	163	175			PEAKS DB
17	56387	NbS00006464g0001.1	R.YVGTSDLQLER.V	Y	68.2	1279.64	11	0.3	640.828	2	43.89	28300	2	13613	1	1	36	46			PEAKS DB
17	56387	NbS00006464g0001.1	K.LAVNLIPFPR.L	Y	57.72	1138.69	10	-0.3	570.35	2	65.22	165000	2	24833	1	1	253	262			PEAKS DB
17	56387	NbS00006464g0001.1	R.VNVYYNEASC(+57.02)GR.F	Y	49.67	1430.62	12	-0.4	716.319	2	36.81	17700	2	10370	1	1	47	58	Carbamidomethylation	C10:Carbamidomethylation:1000.00	PEAKS DB
17	56450	NbS00023211g0007.1	R.YVGTSDLQLER.V	Y	68.2	1279.64	11	0.3	640.828	2	43.89	28300	2	13613	1	1	36	46			PEAKS DB
17	56450	NbS00023211g0007.1	R.VNVYYNEASC(+57.02)GR.F	Y	49.67	1430.62	12	-0.4	716.319	2	36.81	17700	2	10370	1	1	47	58	Carbamidomethylation	C10:Carbamidomethylation:1000.00	PEAKS DB
18	56414	NbS00004085g0015.1	K.DPDQAAILK.V	Y	71.61	969.513	9	-0.3	485.764	2	39.36	372000	2	11495	1	1	159	167			PEAKS DB
18	56414	NbS00004085g0015.1	R.WAMLGAAGFVIPEAFNK.F	Y	59.39	1820.93	17	-1	911.471	2	74.24	0	2	29804	0	0	84	100			PEAKS DB
18	56414	NbS00004085g0015.1	K.TGALLLDGNTLNYFGK.N	Y	53.38	1695.88	16	-0.8	848.948	2	67.03	923000	2	26037	1	1	114	129			PEAKS DB
18	56478	NbS00008488g0031.1	K.DPDQAAILK.V	Y	71.61	969.513	9	-0.3	485.764	2	39.36	372000	2	11495	1	1	77	85			PEAKS DB
18	56478	NbS00008488g0031.1	K.TGALLLDGNTLNYFGK.N	Y	53.38	1695.88	16	-0.8	848.948	2	67.03	923000	2	26037	1	1	29	44			PEAKS DB
19	56392	NbS00003611g0307.1	R.GYSFTTTAER.E	Y	67.7	1131.52	10	0	566.767	2	38.14	97600	2	10957	1	1	199	208			PEAKS DB
19	56392	NbS00003611g0307.1	K.AGFAGDDAPR.A	Y	64.21	975.441	10	-0.7	488.727	2	31.3	181000	2	8170	1	1	21	30			PEAKS DB
19	56396	NbS00041085g0002.1	R.GYSFTTTAER.E	Y	67.7	1131.52	10	0	566.767	2	38.14	97600	2	10957	1	1	233	242			PEAKS DB
19	56396	NbS00041085g0002.1	K.AGFAGDDAPR.A	Y	64.21	975.441	10	-0.7	488.727	2	31.3	181000	2	8170	1	1	21	30			PEAKS DB
19	56417	NbS00017698g0005.1	R.GYSFTTTAER.E	Y	67.7	1131.52	10	0	566.767	2	38.14	97600	2	10957	1	1	230	239			PEAKS DB
19	56417	NbS00017698g0005.1	L.AGFAGDDAPR.A	Y	64.21	975.441	10	-0.7	488.727	2	31.3	181000	2	8170	1	1	11	20			PEAKS DB
19	56494	NbS00009004g0014.1	R.GYSFTTTAER.E	Y	67.7	1131.52	10	0	566.767	2	38.14	97600	2	10957	1	1	265	274			PEAKS DB
19	56494	NbS00009004g0014.1	K.AGFAGDDAPR.A	Y	64.21	975.441	10	-0.7	488.727	2	31.3	181000	2	8170	1	1	21	30			PEAKS DB
19	56495	NbS00018787g0010.1	R.GYSFTTTAER.E	Y	67.7	1131.52	10	0	566.767	2	38.14	97600	2	10957	1	1	210	219			PEAKS DB
19	56495	NbS00018787g0010.1	K.AGFAGDDAPR.A	Y	64.21	975.441	10	-0.7	488.727	2	31.3	181000	2	8170	1	1	21	30			PEAKS DB
19	56505	NbS00056638g0007.1	R.GYSFTTTAER.E	Y	67.7	1131.52	10	0	566.767	2	38.14	97600	2	10957	1	1	167	176			PEAKS DB
19	56505	NbS00056638g0007.1	K.AGFAGDDAPR.A	Y	64.21	975.441	10	-0.7	488.727	2	31.3	181000	2	8170	1	1	4	13			PEAKS DB
20	56433	NbS00010129g0001.1	K.SFTNPIIQFLAR.H	Y	73.35	1405.77	12	-0.8	703.893	2	74.18	99700	2	29757	1	1	160	171			PEAKS DB
20	56433	NbS00010129g0001.1	K.HFGLFSPDQR.A	Y	52.91	1202.58	10	0.1	602.299	2	44.72	13900	2	14104	1	1	301	310			PEAKS DB
20	56434	NbC25742659g0003.1	K.SFTNPIIQFLAR.H	Y	73.35	1405.77	12	-0.8	703.893	2	74.18	99700	2	29757	1	1	184	195			PEAKS DB
20	56434	NbC25742659g0003.1	K.HFGLFSPDQR.A	Y	52.91	1202.58	10	0.1	602.299	2	44.72	13900	2	14104	1	1	325	334			PEAKS DB
21	56418	NbS00030208g0012.1	K.WFVQAELVNGR.W	Y	63.64	1317.68	11	-0.6	659.848	2	57.24	47800	2	20889	1	1	72	82			PEAKS DB
21	56418	NbS00030208g0012.1	K.NYSLPPNEVGYPGGIFNPLNFAPTAEAK.E	Y	58.68	2976.47	28	-1.2	993.161	3	74.34	0	2	29884	0	0	156	183			PEAKS DB
21	56419	NbS00004739g0001.1	K.WFVQAELVNGR.W	Y	63.64	1317.68	11	-0.6	659.848	2	57.24	47800	2	20889	1	1	90	100			PEAKS DB
21	56419	NbS00004739g0001.1	K.NYSLPPNEVGYPGGIFNPLNFAPTAEAK.E	Y	58.68	2976.47	28	-1.2	993.161	3	74.34	0	2	29884	0	0	174	201			PEAKS DB
22	56533	NbS00014241g0002.1	R.IAQIPVSEAYLGR.G	Y	70.37	1415.78	13	-1.1	708.895	2	53.58	0	2	18870	0	0	108	120			PEAKS DB
22	56533	NbS00014241g0002.1	R.ADEISNIIR.E	Y	50	1029.55	9	-0.9	515.779	2	46.97	228000	2	15214	1	1	19	27			PEAKS DB
23	56518	NbS00061093g0007.1	K.LYAPDSAPALAIK.A	Y	64.62	1328.73	13	-0.2	665.374	2	51.49	175000	2	17701	1	1	105	117			PEAKS DB
23	56518	NbS00061093g0007.1	K.EIIIDVPLANK.L	Y	57.32	1223.71	11	-0.8	612.863	2	59.25	207000	2	22076	1	1	170	180			PEAKS DB
23	56519	NbS00000058g0018.1	K.LYAPDSAPALAIK.A	Y	64.62	1328.73	13	-0.2	665.374	2	51.49	175000	2	17701	1	1	98	110			PEAKS DB
23	56519	NbS00000058g0018.1	K.EIIIDVPLANK.L	Y	57.32	1223.71	11	-0.8	612.863	2	59.25	207000	2	22076	1	1	185	195			PEAKS DB
23	56520	NbS00035792g0016.1	K.LYAPDSAPALAIK.A	Y	64.62	1328.73	13	-0.2	665.374	2	51.49	175000	2	17701	1	1	105	117			PEAKS DB
23	56520	NbS00035792g0016.1	K.EIIIDVPLANK.L	Y	57.32	1223.71	11	-0.8	612.863	2	59.25	207000	2	22076	1	1	188	198			PEAKS DB
23	56521	NbS00009051g0007.1	K.LYAPDSAPALAIK.A	Y	64.62	1328.73	13	-0.2	665.374	2	51.49	175000	2	17701	1	1	98	110			PEAKS DB
23	56521	NbS00009051g0007.1	K.EIIIDVPLANK.L	Y	57.32	1223.71	11	-0.8	612.863	2	59.25	207000	2	22076	1	1	185	195			PEAKS DB
